# Supplementary material for: UHPLC-ESI-QTOF-MS/MS Metabolite Profiling of the Antioxidant and Antidiabetic Activities of Red Cabbage and Broccoli Seeds and Sprouts
Source: MDPI journal article supplement (doi:10.3390/antiox10060852), 2021-05-26
Supplement: s1 [file s1]

Supplementary 1. Peak areas of metabolites representing their concentration or relative levels in extracts used to develop heatmap plot.

| No. | Metabolites                 | BR seed<br>(Peak area) | BR sprout<br>(Peak area) | RC seed<br>(Peak area) | RC sprout<br>(Peak area) |
|-----|-----------------------------|------------------------|--------------------------|------------------------|--------------------------|
| 1.  | L-Histidine                 | 0.00                   | 510000.00                | 0.00                   | 530000.00                |
| 2.  | L-Asparagine                | 130000.00              | 120000.00                | 54000.00               | 67000.00                 |
| 3.  | Ornithine                   | 63000.00               | 110000.00                | 0.00                   | 140000.00                |
| 4.  | $\gamma$ -Aminobutyric acid | 0.00                   | 150000.00                | 0.00                   | 180000.00                |
| 5.  | Adenine                     | 0.00                   | 0.00                     | 0.00                   | 100000.00                |
| 6.  | Quinic acid                 | 0.00                   | 49000.00                 | 0.00                   | 2100.00                  |
| 7.  | DL-o-Tyrosine               | 0.00                   | 230000.00                | 0.00                   | 230000.00                |
| 8.  | Uridine                     | 0.00                   | 550000.00                | 0.00                   | 460000.00                |
| 9.  | L-Phenylalanine             | 72000.00               | 470000.00                | 0.00                   | 500000.00                |
| 10. | trans-Cinnamic acid         | 0.00                   | 70000.00                 | 0.00                   | 78000.00                 |
| 11. | L-Tryptophan                | 0.00                   | 250000.00                | 0.00                   | 250000.00                |
| 12. | Actinonin                   | 380000.00              | 340000.00                | 380000.00              | 210000.00                |
| 13. | m-Coumaric acid             | 0.00                   | 0.00                     | 0.00                   | 70000.00                 |
| 14. | Genipin                     | 0.00                   | 55000.00                 | 0.00                   | 330000.00                |
| 15. | Sinapic acid                | 110000.00              | 530000.00                | 75000.00               | 600000.00                |
| 16. | Glycitin                    | 0.00                   | 170000.00                | 0.00                   | 310000.00                |
| 17. | 3-Furoic acid               | 180000.00              | 130000.00                | 170000.00              | 0.00                     |
| 18. | Leucine                     | 0.00                   | 150000.00                | 0.00                   | 150000.00                |
| 19. | D-Serine                    | 29000.00               | 73000.00                 | 0.00                   | 69000.00                 |
| 20. | pyroglutamic acid           | 160000.00              | 320000.00                | 100000.00              | 280000.00                |
| 21. | L-Arginine                  | 110000.00              | 180000.00                | 52000.00               | 130000.00                |
| 22. | Sinigrin                    | 1200000                | 0.00                     | 5300000.00             | 0.00                     |
| 23. | +) -Epicatechin             | 0.00                   | 0.00                     | 68000.00               | 0.00                     |
| 24. | Lysine                      | 0.00                   | 190000.00                | 0.00                   | 250000.00                |

The values are presented as peak area representing the levels of metabolites in the extracts. Zero (0.00) peak area indicates that the corresponding metabolite was not detected in the respective extract.
